# Supplementary material for: SARS-CoV-2 Variants by Whole-Genome Sequencing in a University Hospital in Bangkok: First to Third COVID-19 Waves
Source: MDPI journal article supplement (doi:10.3390/pathogens12040626), 2023-04-21
Supplement: s1 [file s1]

# Supplementary data

**Supplementary Table S1: Global prevalence of amino acid substitutions identified in our study**

| Protein                          | Mutation    | No. of Occurrence (Global) | No. of Countries with This Mutation | Global Frequency * (%) |
|----------------------------------|-------------|----------------------------|-------------------------------------|------------------------|
| <b><u>Structural protein</u></b> |             |                            |                                     |                        |
| <b>Spike</b>                     | A829T       | 974                        | 34                                  | 0.0174                 |
|                                  | D614G       | 5432315                    | 204                                 | 97.2442                |
|                                  | L5F         | 140590                     | 161                                 | 2.5167                 |
|                                  | S459F       | 2181                       | 40                                  | 0.0390                 |
|                                  | V6F         | 4695                       | 62                                  | 0.0840                 |
|                                  | H69del      | 1138065                    | 179                                 | 20.3726                |
|                                  | V70del      | 1139366                    | 179                                 | 20.3959                |
|                                  | Y144F       | 2173                       | 62                                  | 0.0389                 |
|                                  | Y144/145del | 1125931                    | 181                                 | 20.1554                |
|                                  | N501Y       | 1296558                    | 189                                 | 23.2098                |
|                                  | T549I       | 1075                       | 28                                  | 0.0192                 |
|                                  | A570D       | 1144986                    | 181                                 | 20.4965                |
|                                  | P681H       | 1221392                    | 181                                 | 21.8642                |
|                                  | T716I       | 1144025                    | 176                                 | 20.4793                |
|                                  | Q784S       | 80                         | 8                                   | 0.0014                 |
|                                  | Q787H       | 110                        | 19                                  | 0.0020                 |
|                                  | I788V       | 188                        | 16                                  | 0.0034                 |
|                                  | S982A       | 1112492                    | 171                                 | 19.9148                |
|                                  | D1118H      | 1113427                    | 172                                 | 19.9315                |
| <b>Envelope</b>                  | S55F        | 3757                       | 70                                  | 0.0673                 |
| <b>Nucleocapsid</b>              | S187L       | 14932                      | 80                                  | 0.2673                 |
|                                  | S194L       | 97908                      | 141                                 | 1.7527                 |
|                                  | D402Y       | 7933                       | 92                                  | 0.1420                 |
|                                  | D3L         | 1104849                    | 179                                 | 19.7780                |
|                                  | R203K       | 1491718                    | 195                                 | 26.7033                |
|                                  | G204R       | 1408936                    | 195                                 | 25.2214                |
|                                  | S235F       | 1116443                    | 178                                 | 19.9855                |

|                                      |         |         |     |         |
|--------------------------------------|---------|---------|-----|---------|
|                                      | T247del | 41      | 13  | 0.0007  |
|                                      | K248del | 58      | 17  | 0.0010  |
|                                      | K249del | 56      | 17  | 0.0010  |
|                                      | S250del | 58      | 18  | 0.0010  |
|                                      | A251del | 66      | 18  | 0.0012  |
| <b><u>Non-structural protein</u></b> |         |         |     |         |
| <b>Nsp1</b>                          | L16V    | 9       | 3   | 0.0002  |
| <b>Nsp2</b>                          | A476V   | 6429    | 78  | 0.1151  |
|                                      | E373R   | 1       | 1   | 0.0000  |
|                                      | G47S    | 696     | 36  |         |
| <b>Nsp3</b>                          | L557F   | 946     | 30  | 0.0169  |
|                                      | T583I   | 1348    | 50  | 0.0241  |
|                                      | D164G   | 907     | 38  | 0.0162  |
|                                      | P1200S  | 6349    | 78  | 0.1137  |
|                                      | T860del | 30      | 8   | 0.0005  |
|                                      | A861R   | 1       | 1   | 0.0000  |
|                                      | L862M   | 9       | 4   | 0.0002  |
|                                      | F1110I  | 116     | 22  | 0.0021  |
|                                      | L1195I  | 74      | 8   | 0.0013  |
|                                      | V393F   | 2442    | 50  | 0.0437  |
|                                      | T943N   | 118     | 11  | 0.0021  |
|                                      | T183I   | 1115497 | 180 | 19.9686 |
|                                      | A890D   | 1116403 | 176 | 19.9848 |
|                                      | I1412T  | 1091091 | 175 | 19.5317 |
|                                      | Q1530H  | 21      | 12  | 0.0004  |
|                                      | A894del | 16      | 6   | 0.0003  |
|                                      | L895V   | 2       | 2   | 0.0000  |
|                                      | D1755N  | 122     | 18  | 0.0022  |
|                                      | Y1082L  | 29      | 4   | 0.0005  |
|                                      | K1083R  | 319     | 19  | 0.0057  |
|                                      | M1529I  | 2191    | 49  | 0.0392  |
|                                      | Q1530E  | 6       | 9   | 0.0001  |
|                                      | F1532V  | 26      | 9   | 0.0005  |

|              |         |         |     |         |
|--------------|---------|---------|-----|---------|
| <b>Nsp6</b>  | L37F    | 137239  | 164 | 2.4567  |
|              | Q160K   | 3700    | 45  | 0.0662  |
|              | S106del | 1331115 | 187 | 23.8284 |
|              | G107del | 1331224 | 187 | 23.8303 |
|              | F108del | 1328374 | 187 | 23.7793 |
|              | A54del  | 4699    | 55  | 0.0841  |
| <b>Nsp9</b>  | T109I   | 8816    | 88  | 0.1578  |
| <b>Nsp12</b> | P323L   | 5333320 | 203 | 95.4721 |
| <b>Nsp13</b> | T588I   | 11541   | 105 | 0.2066  |
|              | A18V    | 7166    | 89  | 0.1283  |
|              | V232I   | 409     | 22  | 0.0073  |
|              | W167M   | 2       | 2   | 0.0000  |
| <b>Nsp14</b> | T215S   | 13      | 4   | 0.0002  |
|              | T215R   | 6       | 3   | 0.0001  |
|              | W227R   | 7       | 4   | 0.0001  |
|              | C216del | 48      | 12  | 0.0009  |
|              | F217del | 51      | 12  | 0.0009  |
|              | S218del | 68      | 13  | 0.0012  |
|              | T219del | 72      | 16  | 0.0013  |
|              | A220del | 75      | 16  | 0.0013  |
|              | S221del | 75      | 18  | 0.0013  |
|              | D222del | 77      | 20  | 0.0014  |
|              | T223del | 71      | 18  | 0.0013  |
|              | Y224del | 58      | 15  | 0.0010  |
|              | A225del | 56      | 16  | 0.0010  |
|              | C226del | 48      | 12  | 0.0009  |
|              | W227del | 47      | 14  | 0.0008  |
|              | S369F   | 1791    | 57  | 0.0321  |
| <b>Nsp15</b> | V172L   | 4438    | 337 | 0.0794  |
|              | D282N   | 610     | 37  | 0.0109  |
| <b>Nsp16</b> | D114del | 22      | 6   | 0.0004  |
|              | D293G   | 0       | 0   | 0.0000  |
|              | V294I   | 884     | 37  | 0.0158  |

|             |          |         |     |         |
|-------------|----------|---------|-----|---------|
| <b>NS3</b>  | G251V    | 7769    | 77  | 0.1391  |
|             | Q57H     | 497302  | 190 | 8.9022  |
|             | S216P    | 1271    | 51  | 0.0228  |
|             | V13L     | 8318    | 94  | 0.1489  |
|             | G254stop | 7379    | 78  | 0.1321  |
|             | I232L    | 25      | 8   | 0.0004  |
|             | V55F     | 5606    | 85  | 0.1004  |
|             | D27Y     | 27950   | 3   | 0.5003  |
| <b>NS7b</b> | C41F     | 4042    | 77  | 0.0724  |
| <b>NS8</b>  | L84S     | 16155   | 674 | 0.2892  |
|             | D75Y     | 529     | 32  | 0.0095  |
|             | D75N     | 697     | 38  | 0.0125  |
|             | Q27stop  | 1118248 | 178 | 20.0178 |
|             | R52I     | 1116858 | 181 | 19.9929 |
|             | K68stop  | 384613  | 159 | 6.8850  |
|             | Y73C     | 1118494 | 177 | 20.0222 |

\* Global frequency is retrieved on December 6, 2021
